# Supplementary material
Source: PubMed Central journal article supplement (PMC6902689)
Supplement: fj.201802627RR.sd1.pdf [file fj.201802627RR.sd1.pdf]

**Supplemental Video S1.** Consecutive Z-stack confocal images of nonpermeabilized TAS2R14-transfected HEK-293T cells treated with vehicle. Staining was with FLAG antibody (TAS2R14, red), DAPI (nuclei, blue), and the intracellular protein tubulin (green). Results show cell surface expression of TAS2R14 and no detection of tubulin. The movie is representative of 5 experiments performed.

**Supplemental Video S2.** Consecutive Z-stack confocal images of nonpermeabilized TAS2R14-transfected HEK-293T cells treated with 200  $\mu$ M DPD for 18 hours. Staining was with Flag antibody (for TAS2R14, red), DAPI (nuclei, blue), and the intracellular protein tubulin (green). Results show cell surface expression of TAS2R14 and no detection of tubulin, which acts as a negative control. The movie is representative of 5 experiments performed.

**Supplemental Video S3.** Consecutive Z-stack confocal images of TAS2R14-transfected HEK-293T cells treated with vehicle and subsequently permeabilized with 0.2% Triton X-100. Staining was with DAPI (nuclei, blue) and the intracellular protein tubulin (green). Results show an intracellular distribution of tubulin, acting as a positive control for the imaging. The movie is representative of 5 experiments performed.

**Supplemental Video S4.** Consecutive Z-stack confocal images of TAS2R14-transfected HEK-293T cells treated with 200  $\mu$ M DPD for 18 hours and subsequently permeabilized with 0.2% Triton X-100. Staining was with DAPI (nuclei, blue) and the intracellular protein tubulin (green). Results show an intracellular distribution of tubulin, acting as a positive control for the imaging. The movie is representative of 5 experiments performed.
